# Supplementary material for: Systematic Investigation of TCP Gene Family: Genome-Wide Identification and Light-Regulated Gene Expression Analysis in Pepino (Solanum Muricatum)
Source: MDPI journal article supplement (doi:10.3390/cells12071015), 2023-03-26
Supplement: s1 [file s1]

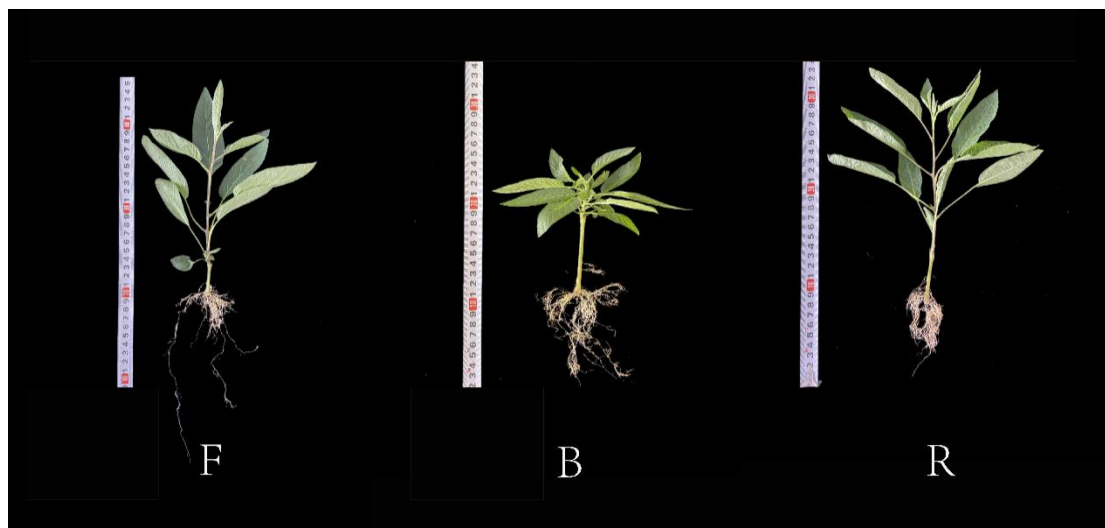

Figure S1 *S. muricatum* seedling phenotypes under different light treatments (30d)

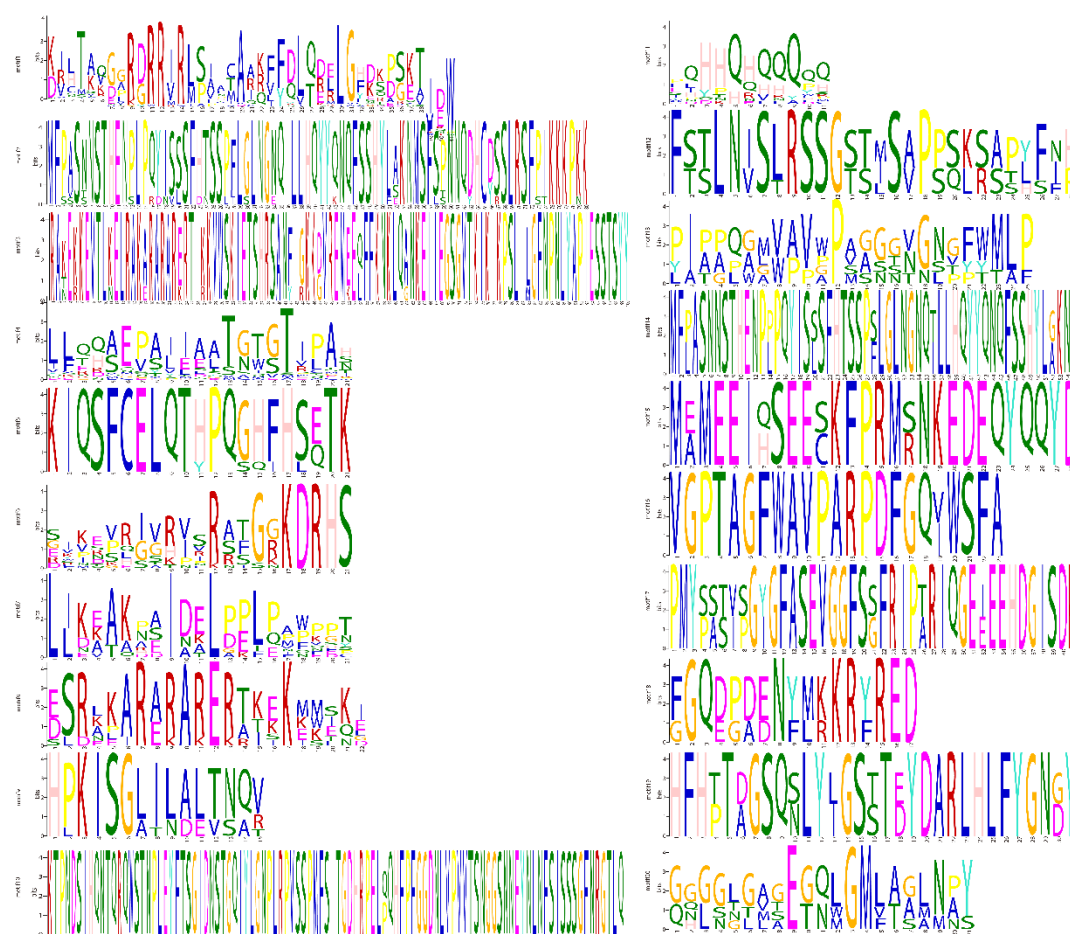

Figure S2 Motif 1-20 for TCP family genes

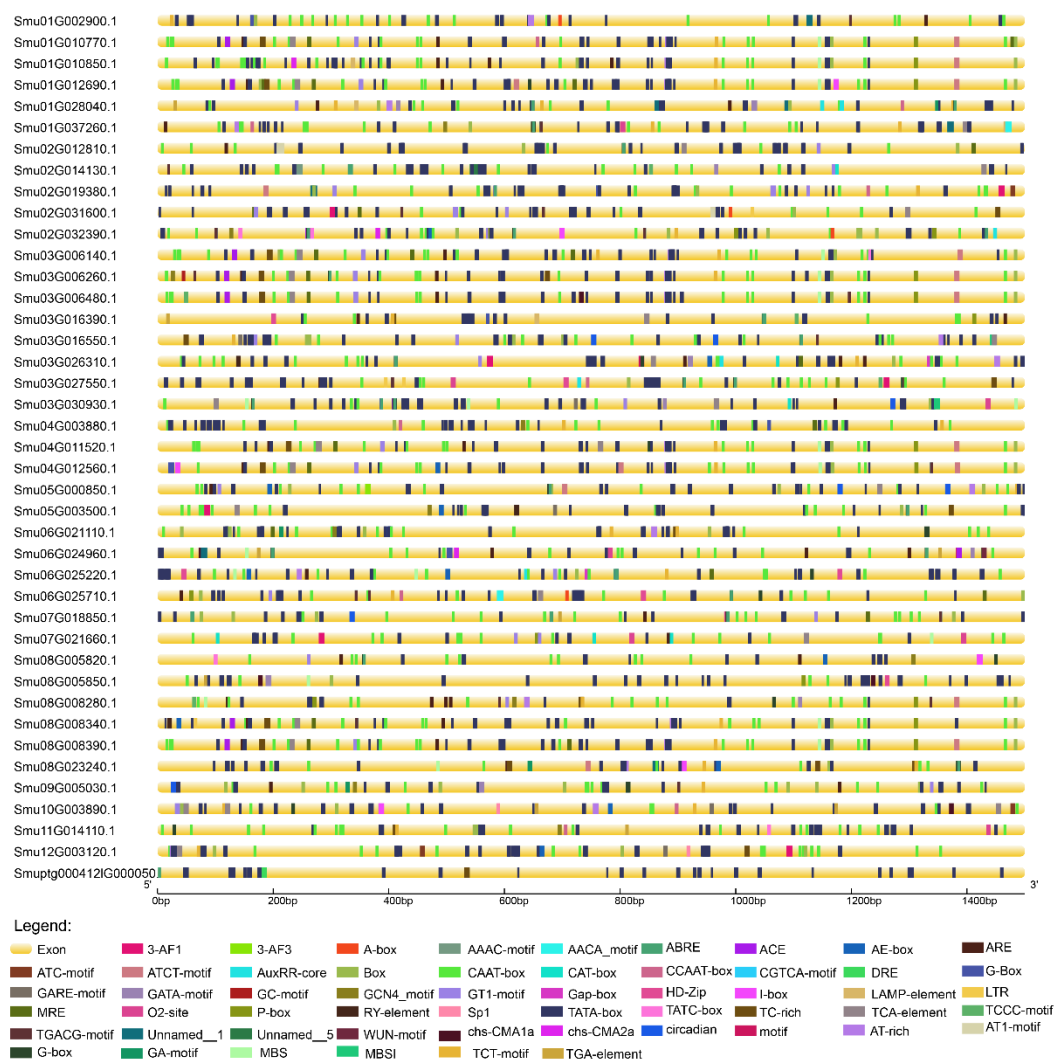

Figure S3 The cis-acting elements in the promoter of each TCP family gene in the network.

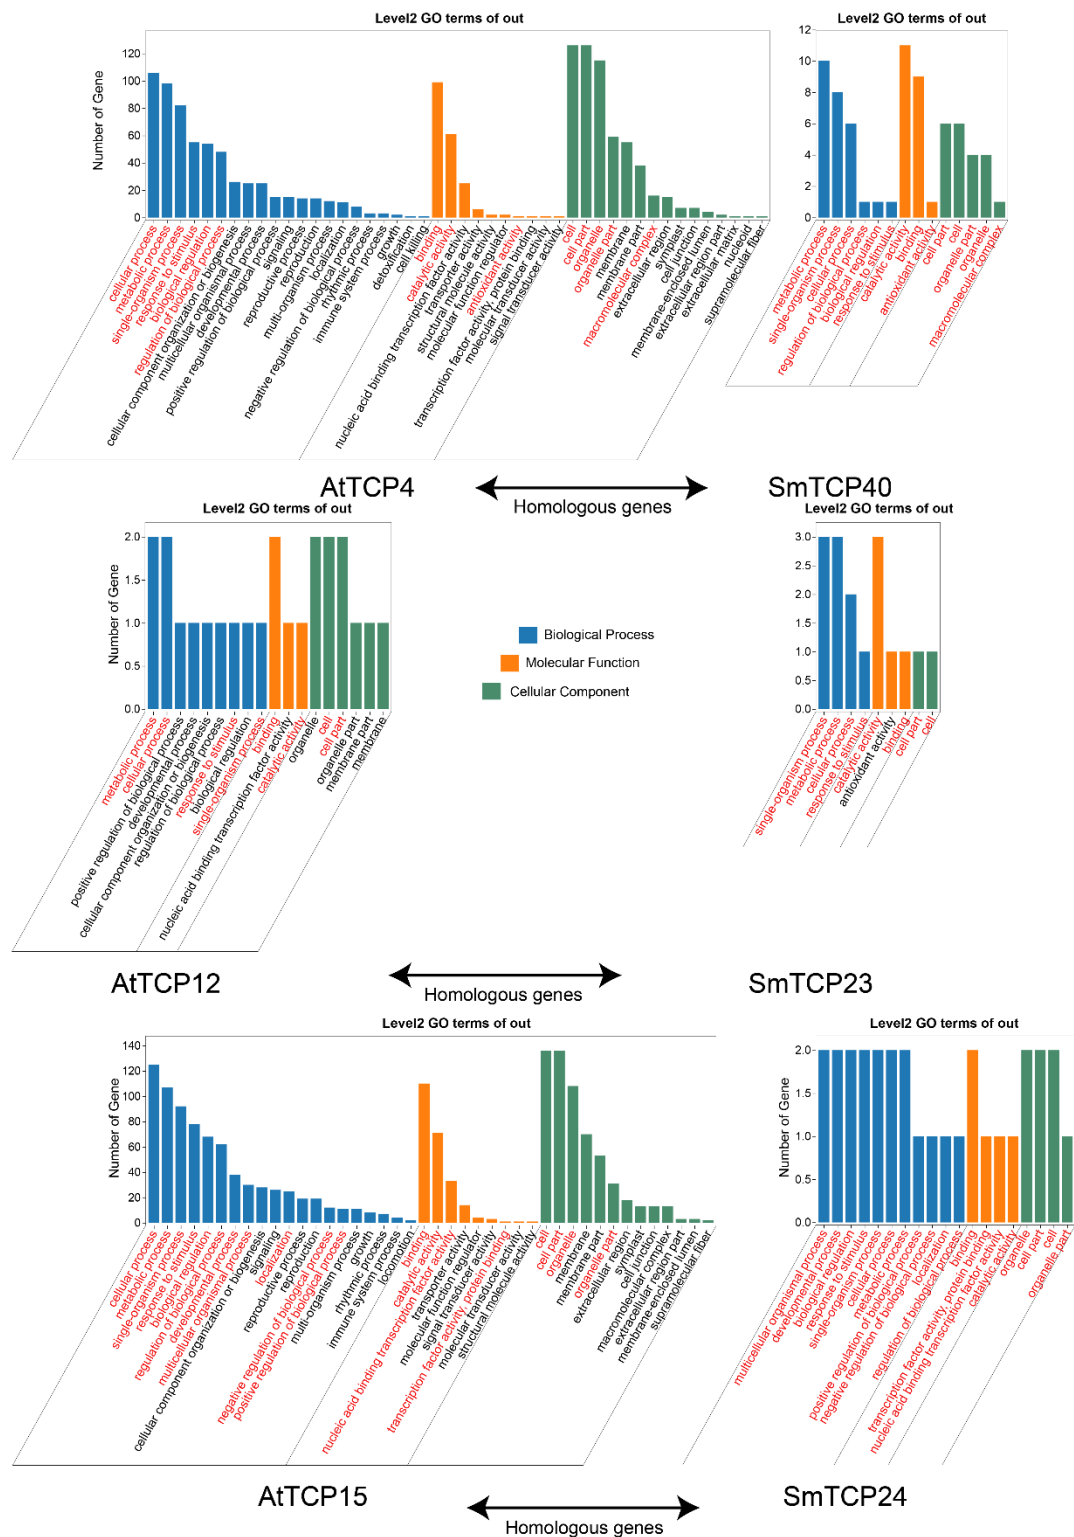

Figure S4 Level2 GO terms of homologous genes of AtTCPs and SmTCPs. Notes: Red font indicates homologous genes annotated to the same pathway.
